# Supplementary material for: Influence of the COVID-19 Pandemic on Medical Management and on Healthcare Delivery of Immune-Mediated Rheumatic and Musculoskeletal Diseases during the First Pandemic Period February to July 2020: A Systematic Review
Source: MDPI journal article supplement (doi:10.3390/medicina60040596), 2024-04-04
Supplement: s1 [file s1]

## Supplementary File S1- Search Strategy

Search-terms according to PICO :

Search-Terms on Embase :

|                | All fields                                                                                                                                                                                                                                                                                                                                                                                                                                                                                                                                                                                                                                                                                                                                                                                                                                                                                                                                                                                                                                                                                                                                                                                                                                                                                                                                                                                                      | Emtree-Terms                                                                                                                                                                                                                                                                                                                                                                                                                                                                                                                                                                                                                                                                                                                                                                                                                                                                                                                                                                                                                                                                                                                                                                                                                                                                                                                                                     |
|----------------|-----------------------------------------------------------------------------------------------------------------------------------------------------------------------------------------------------------------------------------------------------------------------------------------------------------------------------------------------------------------------------------------------------------------------------------------------------------------------------------------------------------------------------------------------------------------------------------------------------------------------------------------------------------------------------------------------------------------------------------------------------------------------------------------------------------------------------------------------------------------------------------------------------------------------------------------------------------------------------------------------------------------------------------------------------------------------------------------------------------------------------------------------------------------------------------------------------------------------------------------------------------------------------------------------------------------------------------------------------------------------------------------------------------------|------------------------------------------------------------------------------------------------------------------------------------------------------------------------------------------------------------------------------------------------------------------------------------------------------------------------------------------------------------------------------------------------------------------------------------------------------------------------------------------------------------------------------------------------------------------------------------------------------------------------------------------------------------------------------------------------------------------------------------------------------------------------------------------------------------------------------------------------------------------------------------------------------------------------------------------------------------------------------------------------------------------------------------------------------------------------------------------------------------------------------------------------------------------------------------------------------------------------------------------------------------------------------------------------------------------------------------------------------------------|
| <b>Patient</b> | Musculoskeletal Diseases OR<br>Musculoskeletal Disorders OR<br>Bone Diseases OR Fasciitis<br>Plantaris OR Joint Diseases OR<br>Arthritis OR Halux Rigidus OR<br>Joint Deformities OR Synovitis<br>OR Muscular Diseases OR<br>Contracture OR Fibromyalgia<br>OR Chronic Fatigue Syndrom<br>OR Muscular Disorders OR<br>Myofascial Pain Syndromes OR<br>Myopathies OR Myositis OR<br>Inclusion Body Myositis OR<br>Polymyositis OR<br>Dermatomyositis OR<br>Polymyalgia Rheumatica OR<br>Tendinopathy OR Rheumatoid<br>Arthritis OR Crystal<br>Arthropathies OR Gout OR<br>Chondrocalcinosis OR<br>Osteoarthritis OR Rheumatic<br>Fever OR Sjogren's syndrome<br>OR Adult-onset Still's Disease<br>OR Felty Syndrom OR<br>Vasculitis OR Aortitis OR<br>Arteritis OR Giant Cell Arteritis<br>OR Polyarteritis Nodosa OR<br>Takayasu Arteritis OR Behcet<br>Syndrom OR Purpura<br>Schoenlein-Henoch OR Anti-<br>Neutrophil Cytoplasmic<br>Antibody-Associated Vasculitis<br>OR Churg-Strauss Syndrom OR<br>Granulomatosis With<br>Polyangiitis OR Microscopic<br>Polyangiitis OR Rheumatoid<br>Vasculitis OR Thromboangiitis<br>Obliterans OR Cutaneous<br>Leukocytoclastic Vasculitis OR<br>Spondylarthritis OR Psoriatic<br>Arthritis OR Reactive Arthritis<br>OR Ankylosing Spondylitis OR<br>Inflammatory Bowel Disease-<br>Associated Arthritis OR<br>Infectious Arthritis OR Whipple<br>Disease OR Hereditary | 'musculoskeletal disease'/exp<br>OR 'musculoskeletal<br>disorders'/exp OR 'bone<br>disease'/exp OR 'fasciitis'/exp<br>OR 'musculoskeletal system<br>inflammation'/exp OR<br>'bursitis'/exp OR<br>'chondritis'/exp OR<br>'enthesitis'/exp OR<br>'synovitis'/exp OR<br>'arthropathy'/exp OR<br>'arthritis'/exp OR 'muscle<br>disease'/exp OR 'myofascial<br>pain'/exp OR 'myopathy'/exp<br>OR 'myositis'/exp OR<br>'antisyndetase syndrome'/exp<br>OR 'dermatomyositis'/exp OR<br>'inclusion body myositis'/exp<br>OR 'polymyositis'/exp OR<br>'rheumatic polymyalgia'/exp<br>OR 'tendinitis'/exp OR<br>'rheumatoid arthritis'/exp OR<br>'gout'/exp OR 'crystal<br>arthropathy'/exp OR<br>'chondrocalcinosis'/exp OR<br>'osteoarthritis'/exp OR<br>'rheumatic fever'/exp OR<br>'Sjogren syndrome'/exp OR<br>'disorders of connective tissue<br>metabolism'/exp OR<br>'ankylosing spondylitis'/exp OR<br>'ankylosing spondylitis'/exp OR<br>'Behcet disease'/exp OR 'lupus<br>erythematosus'/exp OR 'Reiter<br>syndrome'/exp OR<br>'scleroderma'/exp OR<br>'localized scleroderma'/exp OR<br>'systemic sclerosis'/exp OR<br>'Sjogren syndrome'/exp OR<br>'adult onset Still disease'/exp<br>OR 'Felty syndrome'/exp OR<br>'vasculitis'/exp OR 'ANCA<br>associated vasculitis'/exp OR<br>'arteritis'/exp OR 'brain<br>vasculitis'/exp OR 'Buerger<br>disease'/exp OR |

|                     |                                                                                                                                                                                                                                                                                                                                                                                                                                                                       |                                                                                                                                                                                                                                                                                                                                                                                                                                                                                                                                                                                                                                                                                                                                                                                                                                                                                                                                                                                                                                                                                                                                                                                                                                                                                                                                                                                                                                                                                                                                            |
|---------------------|-----------------------------------------------------------------------------------------------------------------------------------------------------------------------------------------------------------------------------------------------------------------------------------------------------------------------------------------------------------------------------------------------------------------------------------------------------------------------|--------------------------------------------------------------------------------------------------------------------------------------------------------------------------------------------------------------------------------------------------------------------------------------------------------------------------------------------------------------------------------------------------------------------------------------------------------------------------------------------------------------------------------------------------------------------------------------------------------------------------------------------------------------------------------------------------------------------------------------------------------------------------------------------------------------------------------------------------------------------------------------------------------------------------------------------------------------------------------------------------------------------------------------------------------------------------------------------------------------------------------------------------------------------------------------------------------------------------------------------------------------------------------------------------------------------------------------------------------------------------------------------------------------------------------------------------------------------------------------------------------------------------------------------|
|                     | <p>Autoinflammatory Diseases OR<br/> Cryopyrin-Associated Periodic<br/> Syndrome OR Familial<br/> Mediterranean Fever OR<br/> systemic scleroderma OR<br/> diffuse scleroderma OR<br/> Sarcoidosis OR<br/> Antiphospholipid Syndrom OR<br/> Undifferentiated Connective<br/> Tissue Diseases OR<br/> Antisynthetase Syndrom OR<br/> Anti-Glomerular Basement<br/> Membrane Disease OR<br/> Systemic Lupus Erythematosus<br/> OR Osteoporosis OR Bone<br/> Density</p> | <p>'capillaritis'/exp OR 'Churg<br/> Strauss syndrome'/exp OR<br/> 'granulomatous vasculitis'/exp<br/> OR 'large vessel vasculitis'/exp<br/> OR 'leukocytoclastic<br/> vasculitis'/exp OR 'microscopic<br/> polyangiitis'/exp OR<br/> 'pulmonary vasculitis'/exp OR<br/> 'rheumatoid vasculitis'/exp OR<br/> 'small vessel vasculitis'/exp OR<br/> 'systemic vasculitis'/exp OR<br/> 'vasculitic rash'/exp OR<br/> 'endarteritis'/exp OR 'giant cell<br/> arteritis'/exp OR 'necrotizing<br/> arteritis'/exp OR<br/> 'periarteritis'/exp OR<br/> 'polyarteritis'/exp OR<br/> 'polyarteritis nodosa'/exp OR<br/> 'temporal arteritis'/exp OR<br/> 'temporal arteritis'/exp OR<br/> 'Wegener granulomatosis'/exp<br/> OR 'psoriatic arthritis'/exp OR<br/> 'aortic arch syndrome'/exp OR<br/> 'anaphylactoid purpura'/exp<br/> OR 'leukocytoclastic<br/> vasculitis'/exp OR<br/> 'spondylarthritis'/exp OR<br/> 'reactive arthritis'/exp OR<br/> 'infectious arthritis'/exp OR<br/> 'intestine lipodystrophy'/exp<br/> OR 'autoinflammatory<br/> disease'/exp OR 'cryopyrin-<br/> associated periodic<br/> syndrome'/exp OR 'familial<br/> Mediterranean fever'/exp OR<br/> 'sarcoidosis'/exp OR<br/> 'antiphospholipid<br/> syndrome'/exp OR<br/> 'undifferentiated connective<br/> tissue disease'/exp OR<br/> 'glomerulonephritis'/exp OR<br/> 'lupus erythematosus'/exp OR<br/> 'metabolic bone disease'/exp<br/> OR 'bone<br/> demineralization'/exp OR<br/> 'osteoporosis'/exp OR<br/> 'osteomalacia'/exp OR<br/> 'osteopenia'/exp</p> |
| <b>Intervention</b> | <p>COVID-19 OR Severe Acute<br/> Respiratory Syndrome<br/> Coronavirus 2 OR SARS-CoV2<br/> OR COVID-19 pandemic OR</p>                                                                                                                                                                                                                                                                                                                                                | <p>Coronavirus disease 2019 OR<br/> severe acute respiratory<br/> syndrom coronavirus 2</p>                                                                                                                                                                                                                                                                                                                                                                                                                                                                                                                                                                                                                                                                                                                                                                                                                                                                                                                                                                                                                                                                                                                                                                                                                                                                                                                                                                                                                                                |

|                |                                                                                                                                                                                                                                                                                                                                                                                                                                                                                                                                       |                                                                                                                                                                                                                                              |
|----------------|---------------------------------------------------------------------------------------------------------------------------------------------------------------------------------------------------------------------------------------------------------------------------------------------------------------------------------------------------------------------------------------------------------------------------------------------------------------------------------------------------------------------------------------|----------------------------------------------------------------------------------------------------------------------------------------------------------------------------------------------------------------------------------------------|
|                | Novel coronavirus pneumonia<br>OR SARS-CoV2-Infection OR<br>COVID-19 Virus Disease OR<br>COVID-19 Virus Infection OR<br>Coronavirus Disease-19 OR<br>2019 Novel Coronavirus<br>Disease                                                                                                                                                                                                                                                                                                                                                |                                                                                                                                                                                                                                              |
| <b>Control</b> |                                                                                                                                                                                                                                                                                                                                                                                                                                                                                                                                       |                                                                                                                                                                                                                                              |
| <b>Outcome</b> | Treatment OR Therapy<br>changes OR Treatment<br>Switching OR Therapeutics OR<br>Therapy OR Consequences OR<br>Disease progression OR<br>Disease Flare OR Symptom<br>Flare Up OR Conservative<br>Treatment OR Pharmaceutical<br>Preparations OR<br>Musculoskeletal Manipulations<br>OR Drug Therapy OR<br>antirheumatic agent OR<br>disease modifying<br>antirheumatic drug OR Route<br>Of Administration OR<br>Orthopedic Procedures OR<br>Replacement Arthroplasty OR<br>Replacement Hip OR<br>Replacement Knee OR<br>Rehabilitation | Therapy OR disease<br>exacerbation OR Treatment<br>Switching OR conservative<br>treatment OR drug therapy OR<br>OR antirheumatic agent OR<br>disease modifying<br>antirheumatic drug OR<br>orthopedic surgery OR<br>replacement arthroplasty |
| <b>Method</b>  | observational studies,<br>Randomised controlled trials,<br>Cohort-Studies                                                                                                                                                                                                                                                                                                                                                                                                                                                             |                                                                                                                                                                                                                                              |

Applied Filters on Embase:

- Date: 2019- 2021
- Languages: German and English
- Age: 19- 64 years, 65 years and older, 80 years and older

**Search-terms on Pubmed and Cochrane:**

|                | <b>All fields</b>                                                                                                                                                                                                                                                                                                                                                                                                                                                                                                                                                                                                                                                                                                                                                                                                                                                                                                                                                                                                                                                                                                                                                                                                                                                                                                                                                                                                                                                                                                                                                                    | <b>Mesh terms</b>                                                                                                                                                                                                                                                                                                                                                                                                                                                                                                                                                                                                                                                                                                                                                                                                                                                                                                                                                                                                                                                                                                                                                                                                                                                                                                                                                                                                                                                                                                                                                  |
|----------------|--------------------------------------------------------------------------------------------------------------------------------------------------------------------------------------------------------------------------------------------------------------------------------------------------------------------------------------------------------------------------------------------------------------------------------------------------------------------------------------------------------------------------------------------------------------------------------------------------------------------------------------------------------------------------------------------------------------------------------------------------------------------------------------------------------------------------------------------------------------------------------------------------------------------------------------------------------------------------------------------------------------------------------------------------------------------------------------------------------------------------------------------------------------------------------------------------------------------------------------------------------------------------------------------------------------------------------------------------------------------------------------------------------------------------------------------------------------------------------------------------------------------------------------------------------------------------------------|--------------------------------------------------------------------------------------------------------------------------------------------------------------------------------------------------------------------------------------------------------------------------------------------------------------------------------------------------------------------------------------------------------------------------------------------------------------------------------------------------------------------------------------------------------------------------------------------------------------------------------------------------------------------------------------------------------------------------------------------------------------------------------------------------------------------------------------------------------------------------------------------------------------------------------------------------------------------------------------------------------------------------------------------------------------------------------------------------------------------------------------------------------------------------------------------------------------------------------------------------------------------------------------------------------------------------------------------------------------------------------------------------------------------------------------------------------------------------------------------------------------------------------------------------------------------|
| <b>Patient</b> | <p>Musculoskeletal Diseases OR<br/> Musculoskeletal Disorders OR<br/> Bone Diseases OR Faszitis<br/> Plantaris OR Joint Diseases OR<br/> Arthritis OR Halux Rigidus OR<br/> Joint Deformities OR Synovitis<br/> OR Muscular Diseases OR<br/> Contracture OR Fibromyalgia<br/> OR Chronic Fatigue Syndrom<br/> OR Muscular Disorders OR<br/> Myofascial Pain Syndromes OR<br/> Myopathies OR Myositis OR<br/> Inclusion Body Myositis OR<br/> Polymyositis OR<br/> Dermatomyositis OR<br/> Polymyalgia Rheumatica OR<br/> Tendinopathy OR Rheumatoid<br/> Arthritis OR Crystal<br/> Arthropathies OR Gout OR<br/> Chondrocalcinosis OR<br/> Osteoarthritis OR Rheumatic<br/> Fever OR Sjogren's syndrome<br/> OR Adult-onset Still's Disease<br/> OR Felty Syndrom OR<br/> Vasculitis OR Aortitis OR<br/> Arteritis OR Giant Cell Arteritis<br/> OR Polyarteritis Nodosa OR<br/> Takayasu Arteritis OR Behcet<br/> Syndrom OR Purpura<br/> Schoenlein-Henoch OR Anti-<br/> Neutrophil Cytoplasmic<br/> Antibody-Associated Vasculitis<br/> OR Churg-Strauss Syndrom OR<br/> Granulomatosis With<br/> Polyangiitis OR Microscopic<br/> Polyangiitis OR Rheumatoid<br/> Vasculitis OR Thromboangiitis<br/> Obliterans OR Cutaneous<br/> Leukocytoclastic Vasculitis OR<br/> Spondylarthritis OR Psoriatic<br/> Arthritis OR Reactive Arthritis<br/> OR Ankylosing Spondylitis OR<br/> Inflammatory Bowel Disease-<br/> Associated Arthritis OR<br/> Infectious Arthritis OR Whipple<br/> Disease OR Hereditary<br/> Autoinflammatory Diseases OR<br/> Cryopyrin-Associated Periodic</p> | <p>Musculoskeletal Diseases OR<br/> Bone Diseases OR Faszitis<br/> Plantaris OR Joint Diseases OR<br/> Arthritis OR Halux Rigidus OR<br/> Joint Deformities OR Synovitis<br/> OR Muscular Diseases OR<br/> Contracture OR Fibromyalgia<br/> OR Chronic Fatigue Syndrom<br/> OR Muscular Disorders OR<br/> Myofascial Pain Syndromes OR<br/> Myopathies OR Myositis OR<br/> (Myositis, Inclusion Body),<br/> Polymyositis OR<br/> Dermatomyositis OR<br/> Polymyalgia Rheumatica OR<br/> Tendinopathy OR (Arthritis,<br/> Rheumatoid) OR Crystal<br/> Arthropathies OR Gout OR<br/> Chondrocalcinosis OR<br/> Osteoarthritis OR Rheumatic<br/> Fever OR Sjogren's syndrome<br/> OR (Still's Disease, Adult-<br/> onset) OR Felty Syndrom OR<br/> Vasculitis OR Aortitis OR<br/> Arteritis OR Giant Cell Arteritis<br/> OR Polyarteritis Nodosa OR<br/> Takayasu Arteritis OR Behcet<br/> Syndrom OR (Purpura,<br/> Schoenlein-Henoch) OR Anti-<br/> Neutrophil Cytoplasmic<br/> Antibody-Associated Vasculitis<br/> OR Churg-Strauss Syndrom OR<br/> Granulomatosis With<br/> Polyangiitis OR Microscopic<br/> Polyangiitis OR Rheumatoid<br/> Vasculitis OR Thromboangiitis<br/> Obliterans OR (Vasculitis,<br/> Leukocytoclastic, Cutaneous)<br/> OR Spondylarthritis OR<br/> (Arthritis, Psoriatic) OR<br/> (Arthritis, Reactive) OR<br/> (Spondylitis, Ankylosing) OR<br/> (Arthritis, Infectious) OR<br/> Whipple Disease OR<br/> Hereditary Autoinflammatory<br/> Diseases OR Cryopyrin-<br/> Associated Periodic Syndrome<br/> OR Familial Mediterranean</p> |

|                     |                                                                                                                                                                                                                                                                                                                                                                                                                                             |                                                                                                                                                                                                                                                                                                                                                                                                      |
|---------------------|---------------------------------------------------------------------------------------------------------------------------------------------------------------------------------------------------------------------------------------------------------------------------------------------------------------------------------------------------------------------------------------------------------------------------------------------|------------------------------------------------------------------------------------------------------------------------------------------------------------------------------------------------------------------------------------------------------------------------------------------------------------------------------------------------------------------------------------------------------|
|                     | Syndrome OR Familial Mediterranean Fever OR systemic sclerosis OR diffuse sclerosis OR Sarcoidosis OR Antiphospholipid Syndrome OR Undifferentiated Connective Tissue Diseases OR Antisynthetase Syndrome OR Anti-Granulomatous Vasculitis OR Anti-Granulomatous Vasculitis OR Systemic Lupus Erythematosus OR Osteoporosis OR Bone Density                                                                                                 | Fever OR (Scleroderma, Systemic) OR (Scleroderma, Diffuse) OR (Scleroderma, Limited) OR Sarcoidosis OR Antiphospholipid Syndrome OR Undifferentiated Connective Tissue Diseases OR Antisynthetase Syndrome OR Anti-Granulomatous Vasculitis OR (Lupus Erythematosus, Systemic) OR osteoporosis OR bone density                                                                                       |
|                     |                                                                                                                                                                                                                                                                                                                                                                                                                                             |                                                                                                                                                                                                                                                                                                                                                                                                      |
| <b>Intervention</b> | COVID-19 OR Severe Acute Respiratory Syndrome Coronavirus 2 OR SARS-CoV2 OR COVID-19 pandemic OR Novel coronavirus pneumonia OR SARS-CoV2-Infection OR COVID-19 Virus Disease OR COVID-19 Virus Infection OR Coronavirus Disease-19 OR 2019 Novel Coronavirus Disease                                                                                                                                                                       | COVID-19, SARS-CoV-2                                                                                                                                                                                                                                                                                                                                                                                 |
|                     |                                                                                                                                                                                                                                                                                                                                                                                                                                             |                                                                                                                                                                                                                                                                                                                                                                                                      |
| <b>Control</b>      |                                                                                                                                                                                                                                                                                                                                                                                                                                             |                                                                                                                                                                                                                                                                                                                                                                                                      |
|                     |                                                                                                                                                                                                                                                                                                                                                                                                                                             |                                                                                                                                                                                                                                                                                                                                                                                                      |
| <b>Outcome</b>      | Treatment OR Therapy changes OR Treatment Switching OR Therapeutics OR Therapy OR Consequences OR Disease progression OR Disease Flare OR Symptom Flare Up OR Conservative Treatment OR Pharmaceutical Preparations OR Musculoskeletal Manipulations OR Drug Therapy OR Molecular Targeted Therapy OR Route Of Administration OR Orthopedic Procedures OR Replacement Arthroplasty OR Replacement Hip OR Replacement Knee OR Rehabilitation | Therapeutics, therapy, Treatment Outcome, Treatment Switching, Conservative Treatment, COVID-19 drug treatment, Supplementary Concept, Symptom Flare Up, Pharmaceutical Preparations, Musculoskeletal Manipulations, Drug Therapy, Molecular Targeted Therapy, Orthopedic Procedures, Arthroplasty, Replacement, (Arthroplasty, Replacement, Hip), (Arthroplasty, Replacement, Knee), Rehabilitation |
|                     |                                                                                                                                                                                                                                                                                                                                                                                                                                             |                                                                                                                                                                                                                                                                                                                                                                                                      |
| <b>Method</b>       | observational studies, Randomised controlled trials, Cohort-Studies                                                                                                                                                                                                                                                                                                                                                                         |                                                                                                                                                                                                                                                                                                                                                                                                      |

Applied filters on Cochrane:

- “Last two years”

Applied filters on Pubmed

- Languages: German and English
- Population: Humans
- Time: 12/2019 – 10/2021
- Age: 19+
